# Supplementary material
Source: HighWire-hosted journal article supplement (http://cmajopen.ca/highwire/filestream/80917/field_highwire_adjunct_files/1/open-2016-0054-2-at.pdf)
Supplement: open-2016-0054-2-at.pdf [file open-2016-0054-2-at.pdf]

Appendix 2 (as supplied by the authors): Program staffing (Full Time Equivalents [FTE]) and number of children receiving care in 2002 versus 2012.

|                                                                                           | Patients in 2002 | Staffing (FTE) in 2002      | Patients in 2012 | Staffing (FTE) in 2012       |
|-------------------------------------------------------------------------------------------|------------------|-----------------------------|------------------|------------------------------|
| Programs that include a freestanding hospice <sup>a</sup> (year program started)          |                  |                             |                  |                              |
| Canuck Place Children's Hospice / BC Children's Hospital, Vancouver (1995)                | 104              | 1.0MD; 1.0APN; 0.5SW; 0.5BC | 250              | 1.5MD; 2.4APN; 2.4 SW; 1.0BC |
| Children's Hospital of Eastern Ontario (1999) / Roger's House, Ottawa (2006) <sup>b</sup> | 31               | 0.5RN                       | 170              | 2.0MD; 1.0APN; 1.0RN; 0.8SW  |
| Alberta Children's Hospital (2001) / Rotary Flames House, Calgary (2009) <sup>b</sup>     | 32               | 0.2MD; 0.5RN; 0.5BC         | 97               | 3.4MD; 0.8APN 0.8SW; 0.8BC   |
| Programs based at a hospital (year program started)                                       |                  |                             |                  |                              |
| Hospital for Sick Children, Toronto (1986)                                                | 33               | 1.0APN; 1.0SW               | 326              | 2.16MD; 2.0APN; 1.8BC        |
| Centre Hospitalier Universitaire de Québec, Quebec (2004)                                 | 0                | 0                           | 110              | 1.2MD; 0.4RN; 0.2Psy         |
| Winnipeg Regional Health Authority, Winnipeg (2006)                                       | 0                | 0                           | 97               | 1.0MD; 1.0APN                |
| Centre Hospitalier Universitaire Sainte-Justine, Montréal (1999)                          | 14               | 1.5APN; 0.8Psy              | 67               | 0.5MD; 2.0APN; 0.8Psy        |
| IWK Health Centre, Halifax (1995)                                                         | 37               | 1.0MD; 1.0APN               | 60               | 1.5MD; 1.0APN; 0.5RN         |
| Montréal Children's Hospital, Montréal (1992)                                             | 43               | 0.8MD; 0.5APN; 0.5BC        | 57               | 0.9MD; 0.5APN                |
| Stollery Children's Hospital, Edmonton (1999)                                             | 23               | 0.5MD; 0.5RN; 0.4BC         | 54               | 1.05MD; 0.8RN; 0.8BC         |
| Children's Hospital, London Health Sciences Centre, London (2008)                         | 0                | 0                           | 52               | 1.0APN                       |
| Royal University Hospital, Saskatoon (2011)                                               | 0                | 0                           | 51               | 0.3MD                        |
| Centre Hospitalier Universitaire de Sherbrooke, Sherbrooke (2004)                         | 0                | 0                           | 10               | 0.1MD; 0.1SW; 0.1Psy         |
| <b>TOTAL</b>                                                                              | <b>317</b>       | <b>14.2 FTE</b>             | <b>1401</b>      | <b>39.61 FTE</b>             |

<sup>a</sup>For programs that include a hospice, only “core staff” are listed. Additional staff (nurses, personal support workers, and others) provide front line care when children are admitted to the hospice. Abbreviations: FTE=Full Time Equivalents, APN=Advanced Practice Nurse, SW=Social Worker, MD=Physician, RN=Registered Nurse, BC=Bereavement Coordinator, Psy=Psychologist

<sup>b</sup>Hospital-based programs started prior to the hospice.
